# Supplementary material for: Spectral signatures of proton delocalization in H+(H2O)n=1−4 ions
Source: Royal Society of Chemistry journal article supplement (doi:10.1039/c8fd00120k), 2018-01-01
Supplement: c8fd00120k1.pdf [file c8fd00120k1.pdf]

# SUPPORTING INFORMATION: Spectral signatures of proton delocalization in $\text{H}^+(\text{H}_2\text{O})_{n=1-4}$ ions

Laura C. Dzugan,<sup>†</sup> Ryan J. DiRisio,<sup>‡</sup> Lindsey R. Madison,<sup>‡</sup> and Anne B. McCoy

<sup>\*,‡</sup>

*Department of Chemistry and Biochemistry, The Ohio State University, Columbus, OH 43210, USA, and Department of Chemistry, University of Washington, Seattle, WA 98195, USA*

E-mail: abmccoy@uw.edu

---

\*To whom correspondence should be addressed

<sup>†</sup>Department of Chemistry and Biochemistry, The Ohio State University, Columbus, OH 43210, USA

<sup>‡</sup>Department of Chemistry, University of Washington, Seattle, WA 98195, USA

## CONTENTS:

- **Table S1:** Harmonic OH stretch and HOH bend frequencies for isotopologues of  $\text{H}_5\text{O}_2^+$ .
- **Table S2:** Harmonic OH stretch and HOH bend frequencies for  $\text{H}_7\text{O}_3^+$ .
- **Table S3:** Harmonic OH stretch and HOH bend frequencies for  $\text{H}_9\text{O}_4^+$ .
- **Table S4:** Anharmonic OH stretch frequencies for the protonated water clusters.
- **Table S5:** Transition frequencies and intensities for  $\text{H}_7\text{O}_3^+$  evaluated using non-degenerate VPT2.
- **Table S6:** Transition frequencies and intensities for  $\text{H}_7\text{O}_3^+$  evaluated using degenerate VPT2.
- **Table S7:** Eigenstates associated with intense transitions for  $\text{H}_7\text{O}_3^+$  evaluated using non-degenerate VPT2.

Table S1: Frequencies and intensities for OH stretches and HOH bends of  $\text{H}_5\text{O}_2^+$  and its deuterated analogues evaluated in uncoupled and coupled representations.

| system                             | Uncoupled <sup>a</sup> |                              |                                 | Coupled <sup>b</sup> |                              |                                 |
|------------------------------------|------------------------|------------------------------|---------------------------------|----------------------|------------------------------|---------------------------------|
|                                    | vibration              | $\omega$ (cm <sup>-1</sup> ) | I(harm) (km mol <sup>-1</sup> ) | vibration            | $\omega$ (cm <sup>-1</sup> ) | I(harm) (km mol <sup>-1</sup> ) |
| $\text{H}^+(\text{H}_2\text{O})_2$ | IHB                    | 1016.73                      | 4025.93                         | IHB                  | 746.78                       | 2657.83                         |
|                                    | Bend                   | 1616.27                      | 118.61                          | Bend                 | 1777.54                      | 1600.89                         |
|                                    | OH                     | 3763.86                      | 252.58                          | OH                   | 3757.85                      | 294.27                          |
| $\text{H}^+(\text{D}_2\text{O})_2$ | IHB                    | 1016.73                      | 4036.63                         | IHB                  | 678.20                       | 1965.64                         |
|                                    | Bend                   | 1187.93                      | 51.01                           | Bend                 | 1432.82                      | 2201.44                         |
|                                    | OH                     | 2712.42                      | 118.70                          | OH                   | 2704.68                      | 181.70                          |
| $\text{D}^+(\text{H}_2\text{O})_2$ | IDB                    | 730.09                       | 2023.10                         | IHB                  | 558.19                       | 1521.06                         |
|                                    | Bend                   | 1616.27                      | 119.46                          | Bend                 | 1705.04                      | 714.41                          |
|                                    | OD                     | 3763.86                      | 252.58                          | OH                   | 3757.57                      | 315.03                          |
| $\text{D}^+(\text{D}_2\text{O})_2$ | IDB                    | 730.09                       | 2033.45                         | IHB                  | 528.42                       | 1321.79                         |
|                                    | Bend                   | 1187.93                      | 51.67                           | Bend                 | 1316.76                      | 827.32                          |
|                                    | OD                     | 2712.42                      | 119.35                          | OH                   | 2704.53                      | 197.08                          |

<sup>a</sup> Frequencies and intensities evaluated based on symmetry adapted linear combinations of equivalent OH bond lengths/HOH angles.

<sup>b</sup> Frequencies and intensities obtained from a full-dimensional normal mode treatment.

Table S2: Frequencies and intensities for OH stretches and HOH bends of  $\text{H}_7\text{O}_3^+$ , evaluated in uncoupled and coupled representations.

| vibration             | Uncoupled <sup>a</sup>           |                                     | vibration | Coupled <sup>b</sup>             |                                     |
|-----------------------|----------------------------------|-------------------------------------|-----------|----------------------------------|-------------------------------------|
|                       | $\omega$<br>( $\text{cm}^{-1}$ ) | I(harm)<br>( $\text{km mol}^{-1}$ ) |           | $\omega$<br>( $\text{cm}^{-1}$ ) | I(harm)<br>( $\text{km mol}^{-1}$ ) |
| HOH bend              | 1635.55                          | 56.93                               | bend      | 1558.82                          | 7.66                                |
| HOH bend              | 1638.39                          | 60.82                               | bend      | 1602.28                          | 18.96                               |
| H <sub>3</sub> O bend | 1641.53                          | 72.88                               | bend      | 1647.13                          | 0.00                                |
| H <sub>3</sub> O bend | 1645.27                          | 22.29                               | bend      | 1649.97                          | 37.14                               |
| IHB                   | 2451.42                          | 4818.86                             | IHB       | 2543.60                          | 4542.70                             |
| IHB                   | 2617.16                          | 990.18                              | IHB       | 2638.04                          | 1003.14                             |
| OH sym                | 3791.89                          | 115.01                              | OH sym    | 3785.85                          | 109.09                              |
| OH sym                | 3792.95                          | 28.85                               | OH sym    | 3786.75                          | 37.17                               |
| free OH               | 3858.48                          | 219.45                              | free OH   | 3858.69                          | 269.09                              |
| OH asym               | 3908.30                          | 0.00                                | OH asym   | 3907.12                          | 0.00                                |
| OH asym               | 3908.77                          | 369.42                              | OH asym   | 3907.62                          | 405.02                              |

<sup>a</sup> Frequencies and intensities evaluated based on symmetry adapted linear combinations of equivalent OH bond lengths/HOH angles.

<sup>b</sup> Frequencies and intensities obtained from a full-dimensional normal mode treatment.

Table S3: Frequencies and intensities for OH stretches and HOH bends of  $\text{H}_9\text{O}_4^+$ , evaluated in uncoupled and coupled representations.

| vibration             | Uncoupled <sup>a</sup>           |                                     | vibration | Coupled <sup>b</sup>             |                                     |
|-----------------------|----------------------------------|-------------------------------------|-----------|----------------------------------|-------------------------------------|
|                       | $\omega$<br>( $\text{cm}^{-1}$ ) | I(harm)<br>( $\text{km mol}^{-1}$ ) |           | $\omega$<br>( $\text{cm}^{-1}$ ) | I(harm)<br>( $\text{km mol}^{-1}$ ) |
| HOH bend              | 1640.63                          | 73.93                               | bend      | 1607.49                          | 30.01                               |
| HOH bend              | 1640.63                          | 73.93                               | bend      | 1607.49                          | 30.01                               |
| HOH bend              | 1645.19                          | 0.00                                | bend      | 1633.64                          | 0.00                                |
| H <sub>3</sub> O bend | 1655.28                          | 45.65                               | bend      | 1653.47                          | 26.90                               |
| H <sub>3</sub> O bend | 1655.28                          | 45.65                               | bend      | 1653.47                          | 26.90                               |
| IHB                   | 2965.63                          | 3359.13                             | IHB       | 3007.28                          | 3224.39                             |
| IHB                   | 2965.63                          | 3359.13                             | IHB       | 3007.28                          | 3224.39                             |
| IHB                   | 3022.41                          | 0.00                                | IHB       | 3025.48                          | 0.00                                |
| OH sym                | 3799.99                          | 84.31                               | OH sym    | 3793.85                          | 76.19                               |
| OH sym                | 3799.99                          | 84.31                               | OH sym    | 3793.85                          | 76.19                               |
| OH sym                | 3801.12                          | 0.00                                | OH sym    | 3794.88                          | 0.00                                |
| OH asym               | 3917.39                          | 0.00                                | OH asym   | 3916.29                          | 0.00                                |
| OH asym               | 3917.39                          | 0.00                                | OH asym   | 3916.29                          | 0.00                                |
| OH asym               | 3917.94                          | 468.86                              | OH asym   | 3916.89                          | 512.53                              |

<sup>a</sup> Frequencies and intensities evaluated based on symmetry adapted linear combinations of equivalent OH bond lengths/HOH angles.

<sup>b</sup> Frequencies and intensities obtained from a full-dimensional normal mode treatment.

Table S4: Harmonic ( $\omega$ ) and anharmonic ( $\nu$ ) frequencies and intensities evaluated using VPT2 implemented in Gaussian 16 at the MP2/aug-cc-pVTZ level of theory and basis are compared to the quantities obtained from the anharmonically coupled harmonic oscillator (HCAO) model described in the text.

| system                   | state | G16                              |                               |                                     |                                       | HCAO                              |                                     |
|--------------------------|-------|----------------------------------|-------------------------------|-------------------------------------|---------------------------------------|-----------------------------------|-------------------------------------|
|                          |       | $\omega$<br>( $\text{cm}^{-1}$ ) | $\nu$<br>( $\text{cm}^{-1}$ ) | I(harm)<br>( $\text{km mol}^{-1}$ ) | I(anharm)<br>( $\text{km mol}^{-1}$ ) | frequency<br>( $\text{cm}^{-1}$ ) | I(HCAO)<br>( $\text{km mol}^{-1}$ ) |
| $\text{H}_3\text{O}^+$   | 1     | 3684.96                          | 3501.65                       | 481.40                              | 483.38                                | 3526.16                           | 490.42                              |
|                          | 2     | 3684.95                          | 3501.69                       | 481.40                              | 483.38                                | 3526.16                           | 490.42                              |
|                          | 3     | 3575.65                          | 3410.41                       | 32.86                               | 25.36                                 | 3416.80                           | 34.84                               |
| $\text{H}_5\text{O}_2^+$ | 1     | 3837.68                          | 3658.06                       | 336.49                              | 302.36                                | 3682.57                           | 339.79                              |
|                          | 2     | 3837.30                          | 3655.39                       | 240.61                              | 230.48                                | 3682.17                           | 242.92                              |
|                          | 3     | 3741.35                          | 3574.62                       | 8.88                                | 26.03                                 | 3586.25                           | 9.35                                |
|                          | 4     | 3733.51                          | 3568.43                       | 240.98                              | 238.15                                | 3578.42                           | 243.87                              |
| $\text{H}_7\text{O}_3^+$ | 1     | 3897.355                         | 3721.374                      | 406.88                              | 332.94                                | 3742.26                           | 407.80                              |
|                          | 2     | 3896.857                         | 3719.831                      | 2.27                                | 3.23                                  | 3741.76                           | 2.26                                |
|                          | 3     | 3811.823                         | 3680.908                      | 205.21                              | 210.40                                | 3656.64                           | 203.55                              |
|                          | 4     | 3789.753                         | 3572.278                      | 26.84                               | 18.52                                 | 3634.62                           | 26.01                               |
|                          | 5     | 3788.976                         | 3621.492                      | 132.60                              | 110.16                                | 3633.62                           | 139.68                              |
|                          | 6     | 2619.978                         | 2293.884                      | 1185.10                             | 208.68                                | 2190.42                           | 1278.88                             |
|                          | 7     | 2463.714                         | 1790.595                      | 4087.41                             | 1799.83                               | 2034.54                           | 4311.99                             |
| $\text{H}_9\text{O}_4^+$ | 1     | 3906.38                          | 3710.72                       | 459.33                              | 210.69                                | 3751.73                           | 458.32                              |
|                          | 2     | 3905.84                          | 3730.43                       | 32.61                               | 2.03                                  | 3751.19                           | 32.46                               |
|                          | 3     | 3905.84                          | 3750.84                       | 32.60                               | 213.37                                | 3751.18                           | 32.46                               |
|                          | 4     | 3797.78                          | 3651.26                       | 0.06                                | 36.88                                 | 3643.10                           | 0.07                                |
|                          | 5     | 3796.76                          | 3631.21                       | 79.61                               | 77.66                                 | 3641.94                           | 84.74                               |
|                          | 6     | 3796.76                          | 3613.54                       | 79.61                               | 41.65                                 | 3641.94                           | 84.74                               |
|                          | 7     | 3021.19                          | 2852.68                       | 170.00                              | 212.83                                | 2669.18                           | 190.54                              |
|                          | 8     | 2927.37                          | 2674.89                       | 2952.19                             | 1216.55                               | 2575.94                           | 3225.24                             |
|                          | 9     | 2927.37                          | 2573.33                       | 2952.19                             | 691.90                                | 2575.94                           | 3225.25                             |

**Table S5: The frequencies and intensities of transitions evaluated using non-degenerate VPT2.**

| State | Description                                                                                | Non-deg. PT<br>Frequency<br>( $\text{cm}^{-1}$ ) | Non-deg. PT<br>Intensity<br>( $\text{km mol}^{-1}$ ) |
|-------|--------------------------------------------------------------------------------------------|--------------------------------------------------|------------------------------------------------------|
| 1     | $\text{H}_3\text{O}^+$ umbrella overtone with OO stretch                                   | 1499                                             | 4380                                                 |
| 2     | HOH bend                                                                                   | 1504                                             | 12                                                   |
| 3     | HOH bend                                                                                   | 1531                                             | 20                                                   |
| 4     | HOH bend                                                                                   | 1613                                             | 23                                                   |
| 5     | OOO bend + HOH bend                                                                        | 1639                                             | 617                                                  |
| 6     | out-of-plane $\text{H}_3\text{O}^+$ rotation<br>+ in-plane $\text{H}_3\text{O}^+$ rotation | 1768                                             | 384                                                  |
| 7     | $\text{H}_3\text{O}^+$ umbrella +<br>out-of-plane $\text{H}_3\text{O}^+$ rotation          | 1930                                             | 3796                                                 |
| 8     | $\text{H}_3\text{O}^+$ umbrella overtone                                                   | 1986                                             | 11438                                                |
| 9     | out-of-plane $\text{H}_3\text{O}^+$ rotation overtone                                      | 2016                                             | 102                                                  |
| 10    | out-of-plane HOH rotation<br>+ asymmetric IHB                                              | 2184                                             | 419                                                  |
| 11    | symmetric IHB                                                                              | 2194                                             | 930                                                  |
| 12    | in-plane $\text{H}_3\text{O}^+$ rotation + HOH bend                                        | 2211                                             | 1004                                                 |
| 13    | asymmetric IHB                                                                             | 2256                                             | 3615                                                 |
| 14    | out-of-plane HOH rotation<br>+ asymmetric IHB                                              | 2353                                             | 243                                                  |
| 15    | OO stretch + symmetric IHB                                                                 | 2500                                             | 138                                                  |
| 16    | out-of-plane $\text{H}_3\text{O}^+$ umbrella<br>+ HOH bend                                 | 2638                                             | 209                                                  |
| 17    | OO stretch and asymmetric IHB                                                              | 2657                                             | 237                                                  |

**Table S6: The frequencies and intensities of transitions evaluated using degenerate VPT2.**

| Frequency ( $\text{cm}^{-1}$ ) | Intensity ( $\text{km mol}^{-1}$ ) |
|--------------------------------|------------------------------------|
| 1427                           | 6                                  |
| 1576                           | 13                                 |
| 1594                           | 20                                 |
| 1603                           | 23                                 |
| 1616                           | 2                                  |
| 1738                           | 3                                  |
| 1864                           | 1996                               |
| 1962                           | 290                                |
| 2076                           | 68                                 |
| 2131                           | 175                                |
| 2182                           | 570                                |
| 2268                           | 291                                |
| 2291                           | 493                                |
| 2370                           | 285                                |
| 2511                           | 451                                |
| 2627                           | 84                                 |
| 2643                           | 156                                |



**Table S7: The eigenvectors for the excited states in Table S6 with intensities exceeding 250 km/mole.**

| Basis                                                                                       | 1864 cm <sup>-1</sup><br>1996 (km mol <sup>-1</sup> ) | 2182 cm <sup>-1</sup><br>570 (km mol <sup>-1</sup> ) | 2291 cm <sup>-1</sup><br>493 (km mol <sup>-1</sup> ) | 2511 cm <sup>-1</sup><br>451 (km mol <sup>-1</sup> ) | 2268 cm <sup>-1</sup><br>291 (km mol <sup>-1</sup> ) | 1962 cm <sup>-1</sup><br>290 (km mol <sup>-1</sup> ) | 2370 cm <sup>-1</sup><br>285 (km mol <sup>-1</sup> ) |
|---------------------------------------------------------------------------------------------|-------------------------------------------------------|------------------------------------------------------|------------------------------------------------------|------------------------------------------------------|------------------------------------------------------|------------------------------------------------------|------------------------------------------------------|
| H <sub>3</sub> O <sup>+</sup> umbrella overtone                                             | -0.0999887                                            | 0.0786380                                            | 0.0811653                                            | 0.0220112                                            | -0.3317440                                           | 0.3718431                                            | 0.2077090                                            |
| Asymmetric IHB                                                                              | -0.7756729                                            | -0.3960983                                           | -0.3693140                                           | -0.3179659                                           | -0.0272219                                           | -0.0482199                                           | -0.0163480                                           |
| Symmetric IHB                                                                               | -0.0389290                                            | 0.0427128                                            | -0.0499363                                           | -0.0055641                                           | 0.5126822                                            | 0.5256205                                            | -0.5155341                                           |
| H <sub>3</sub> O <sup>+</sup> umbrella +<br>out-of-plane H <sub>3</sub> O <sup>+</sup> rot. | 0.5722478                                             | -0.7322176                                           | -0.3099396                                           | -0.1269017                                           | -0.0258428                                           | 0.0626847                                            | -0.0098142                                           |
| in-plane H <sub>3</sub> O <sup>+</sup> rot.<br>+ HOH bend                                   | 0.1784513                                             | 0.5108411                                            | -0.8210234                                           | -0.1087296                                           | -0.1436027                                           | 0.0148703                                            | -0.0121748                                           |
| OO stretch +<br>symmetric IHB                                                               | 0.1636175                                             | 0.1764470                                            | 0.2659640                                            | -0.9329318                                           | 0.0173335                                            | 0.0121485                                            | 0.0213834                                            |
| out-of-plane H <sub>3</sub> O <sup>+</sup><br>rot. overtone                                 | -0.0234618                                            | -0.0320670                                           | 0.0211757                                            | 0.0012558                                            | -0.2395484                                           | 0.7155379                                            | 0.1659745                                            |
| out-of-plane H <sub>3</sub> O <sup>+</sup> rot.<br>+ HOH bend                               | -0.0009791                                            | 0.0018364                                            | -0.0028375                                           | -0.0009023                                           | 0.0272687                                            | 0.0151659                                            | -0.0382634                                           |
| out-of-plane HOH rot.<br>+ asymmetric IHB                                                   | -0.0100928                                            | -0.0721680                                           | 0.0235755                                            | 0.0010699                                            | -0.2857866                                           | 0.2117899                                            | 0.1595813                                            |
| out-of-plane HOH rot.<br>+ asymmetric IHB                                                   | 0.0058616                                             | -0.0210046                                           | 0.1103165                                            | -0.0020306                                           | -0.6502292                                           | -0.1007518                                           | -0.7370257                                           |
| HOH bend +<br>asymmetric IHB                                                                | 0.0068944                                             | -0.0134888                                           | 0.0215635                                            | 0.0093126                                            | -0.2053601                                           | -0.1077129                                           | 0.3040194                                            |
